# Supplementary material for: Heritable Bovine Rumen Bacteria Are Phylogenetically Related and Correlated with the Cow’s Capacity To Harvest Energy from Its Feed
Source: PubMed Central journal article supplement (PMC5559629; doi:10.1128/mbio.00703-17), 2017-08-15

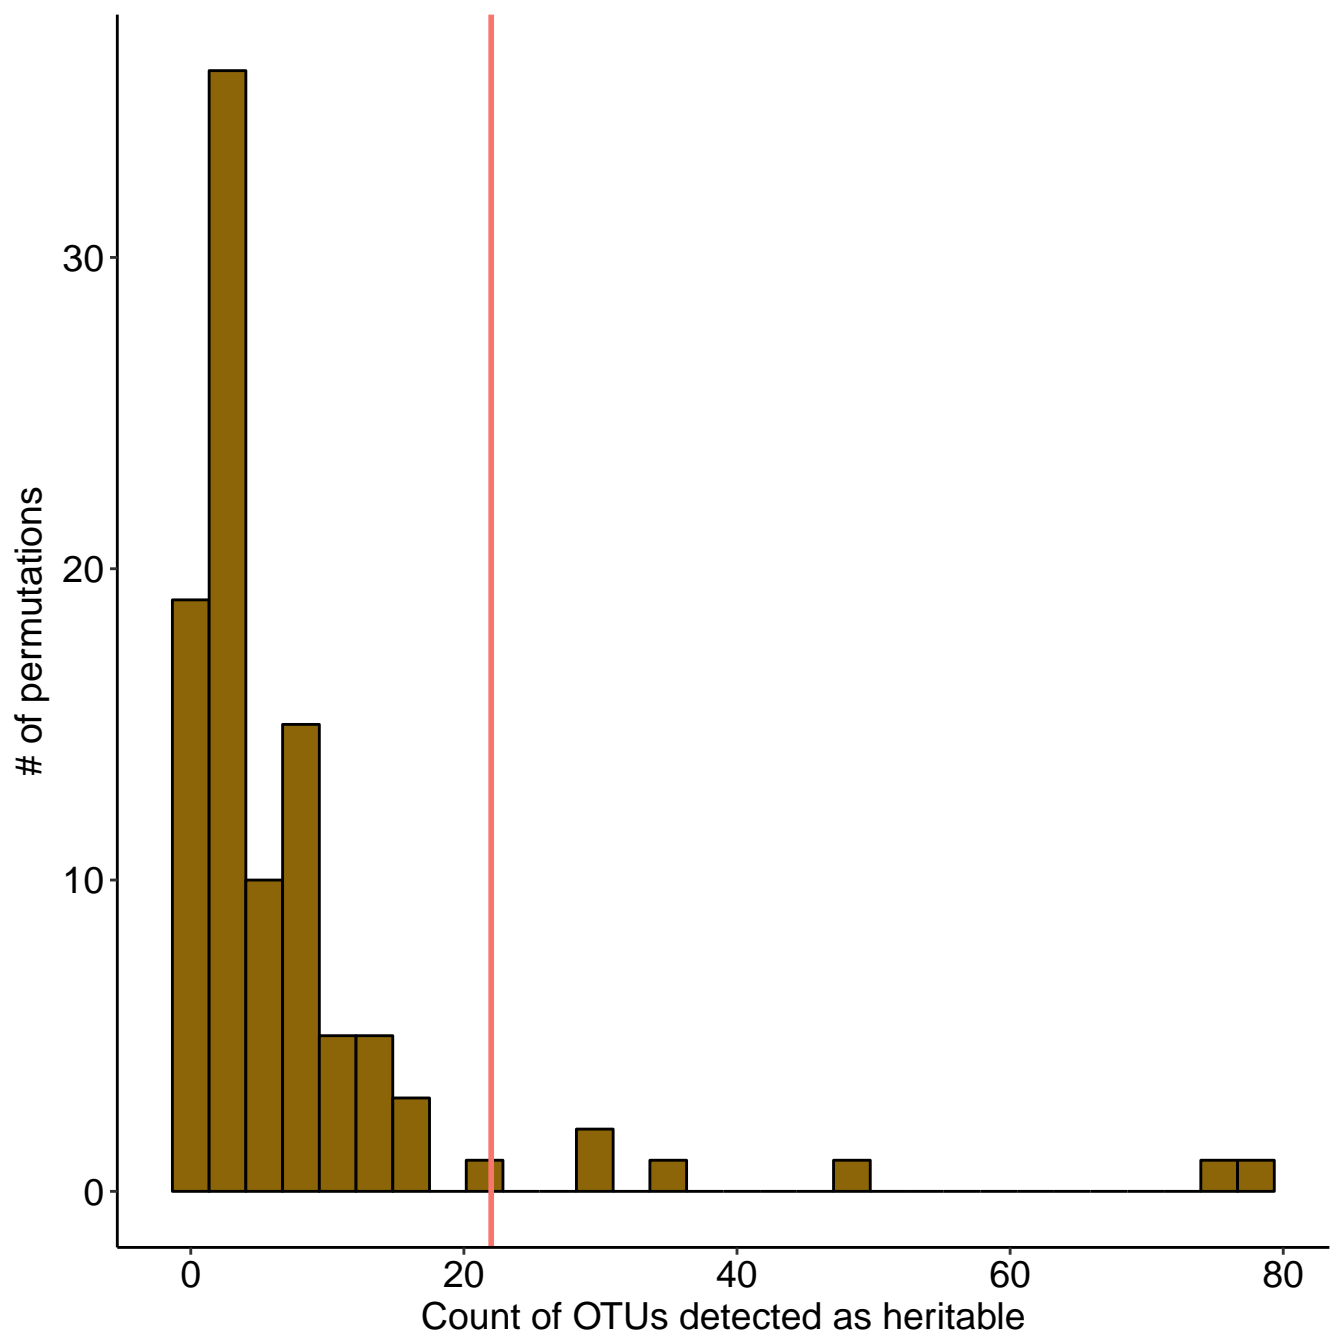

Supplement: mbo004173383sf1.pdf [file mbo004173383sf1.pdf]
