# Supplementary material for: Heritable Bovine Rumen Bacteria Are Phylogenetically Related and Correlated with the Cow’s Capacity To Harvest Energy from Its Feed
Source: PubMed Central journal article supplement (PMC5559629; doi:10.1128/mbio.00703-17), 2017-08-15
Supplement: mbo004173383sf3.pdf [file mbo004173383sf3.pdf]

OTU Taxonomy

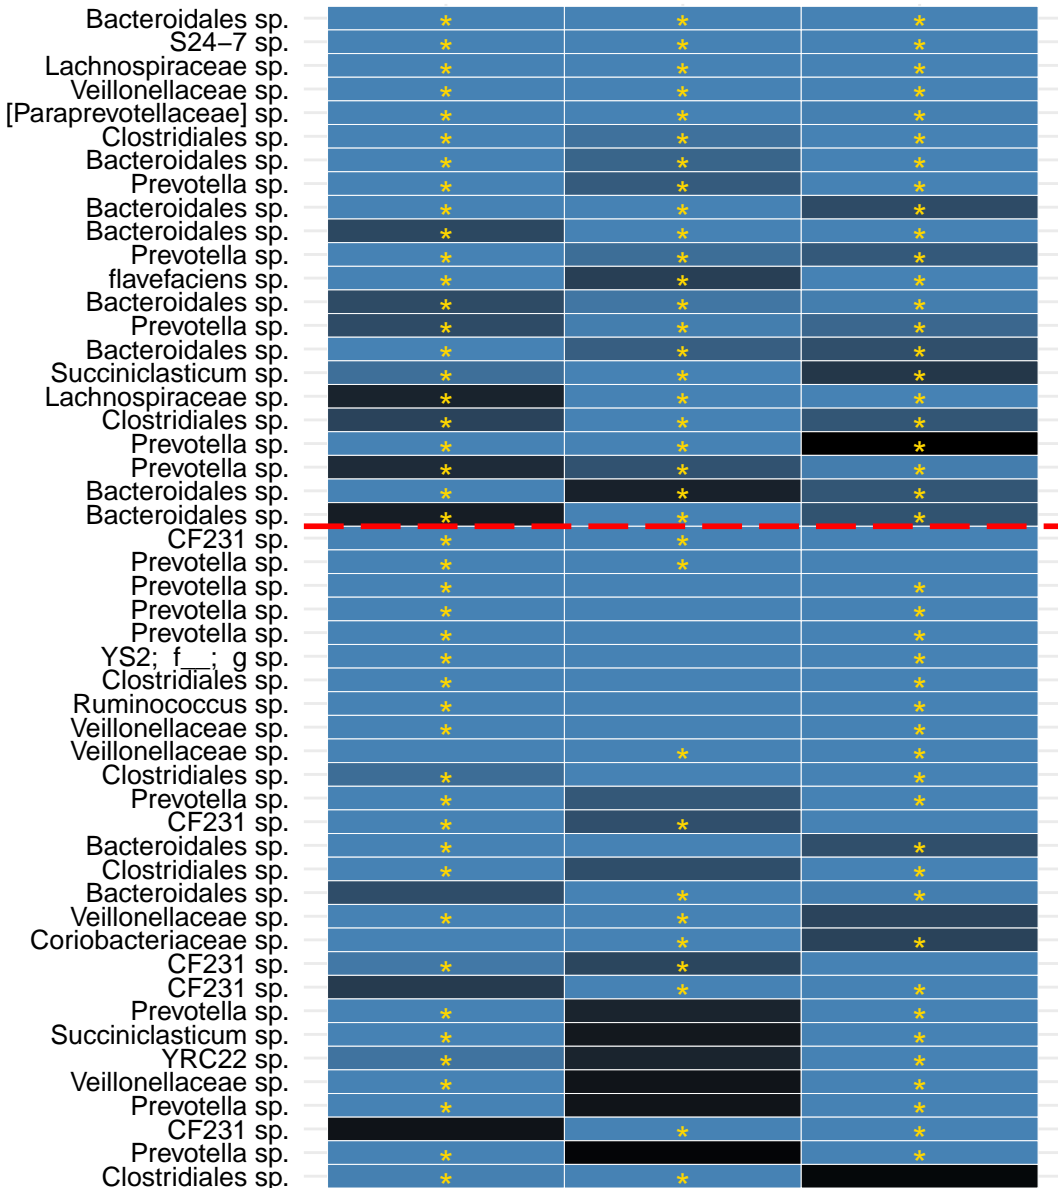

Heritability estimate

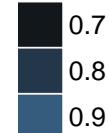

Day A

Day B

Day C

Sampling date
